# Supplementary material for: The role of somatosensory innervation of adipose tissues
Source: Nature. 2022 Aug 31;609(7927):569–74. doi: 10.1038/s41586-022-05137-7 (PMC9477745; doi:10.1038/s41586-022-05137-7)
Supplement: Supplementary file 7 — Source Data Fig. 3 [file 41586_2022_5137_MOESM7_ESM.xlsx]

## Sheet: 3e
Fig 3e: qPCR analysis of unilateral sensory ablation
	iWAT
	Delta Cq (reference: Tbp)
	Sample	Treatment	Ear Tag	Fat pad	Surgery	Group	UCP1	Elovl3	Cidea	Fasn	Acacb	ChREBPbeta
	ve06-Ri-02	RT	2	Right	YFP	Ctl_RT	4.55875	9.16685	4.06476	-2.06795	1.29979	8.13957
	ve06-Ri-05	RT	4	Left	YFP	Ctl_RT	3.11166	8.71172	3.693	-1.32951	2.68987	8.34734
	ve06-Ri-10	RT	6	Right	YFP	Ctl_RT	3.53972	8.51411	3.68306	-1.44529	2.69651	8.85674
	ve06-Ri-13	RT	12	Left	YFP	Ctl_RT	1.65044	6.79622	0.822734	-3.23468	1.61911	5.64836
	ve06-Ri-17	RT	9	Left	YFP	Ctl_RT	8.84282	9.88437	4.62047	-0.811091	3.36642	8.0538
	ve06-Ri-01	RT	2	Left	Cre	Abl_RT	2.19734	6.07607	2.16293	-2.19405	1.85815	7.55612
	ve06-Ri-06	RT	4	Right	Cre	Abl_RT	-0.611991	4.51963	-0.0318487	-3.34576	0.359347	5.52847
	ve06-Ri-09	RT	6	Left	Cre	Abl_RT	2.94897	6.3585	0.313203	-3.68619	0.0592809	6.65441
	ve06-Ri-14	RT	12	Right	Cre	Abl_RT	-2.4576	2.27491	-1.42332	-4.34006	0.0105168	3.68365
	ve06-Ri-18	RT	9	Right	Cre	Abl_RT	-0.196698	4.23141	0.409733	-2.35449	1.53745	6.32051
	Delta Delta Cq
	Sample	Treatment	Ear Tag	Fat pad	Surgery	Group	UCP1	Elovl3	Cidea	Fasn	Acacb	ChREBPbeta
	ve06-Ri-02	RT	2	Right	YFP	Ctl_RT	0.218075	0.552193	0.687956	-0.290248	-1.03455	0.330409
	ve06-Ri-05	RT	4	Left	YFP	Ctl_RT	-1.22902	0.0970681	0.316195	0.448196	0.355533	0.538182
	ve06-Ri-10	RT	6	Right	YFP	Ctl_RT	-0.800955	-0.100544	0.306259	0.332415	0.362171	1.04758
	ve06-Ri-13	RT	12	Left	YFP	Ctl_RT	-2.69024	-1.81844	-2.55407	-1.45698	-0.715233	-2.16081
	ve06-Ri-17	RT	9	Left	YFP	Ctl_RT	4.50214	1.26972	1.24366	0.966614	1.03208	0.244636
	ve06-Ri-01	RT	2	Left	Cre	Abl_RT	-2.14334	-2.53858	-1.21387	-0.416348	-0.476194	-0.253044
	ve06-Ri-06	RT	4	Right	Cre	Abl_RT	-4.95267	-4.09503	-3.40865	-1.56806	-1.97499	-2.28069
	ve06-Ri-09	RT	6	Left	Cre	Abl_RT	-1.3917	-2.25616	-3.0636	-1.90848	-2.27506	-1.15475
	ve06-Ri-14	RT	12	Right	Cre	Abl_RT	-6.79828	-6.33974	-4.80013	-2.56236	-2.32382	-4.12552
	ve06-Ri-18	RT	9	Right	Cre	Abl_RT	-4.53738	-4.38325	-2.96707	-0.576786	-0.796893	-1.48865
				two-tailed paired t test			UCP1	Elovl3	Cidea	Fasn	Acacb	ChREBPbeta
					Below threshold?		Yes	Yes	Yes	Yes	Yes	Yes
					P value		0.04827	0.002858	0.002153	0.01999	0.049174	0.00713
					Mean of YFP		-8e-07	-2e-07	4e-07	-1e-06	6e-07	-8e-07
					Mean of Cre		-3.965	-3.923	-3.091	-1.406	-1.569	-1.861
					Difference		3.965	3.923	3.091	1.406	1.569	1.861
					SE of difference		1.41	0.6016	0.4394	0.3753	0.562	0.367
					t ratio		2.811	6.52	7.034	3.748	2.793	5.07
					df		4	4	4	4	4	4

## Sheet: 3g
Fig 3g: qPCR analysis of unilateral sensory ablation after 6-OHDA treatment
	iWAT												2-way RM ANOVA:
	Delta Cq (reference: Tbp)												Ucp1
	Sample	Ear Tag	Surgery	TX	UCP1	Elovl3	Cidea	Fasn	Acacb	ChREBPb			Two-way RM ANOVA	Matching: Across row		Source of Variation	% of total variation	P value	P value summary	Significant?		Šídák's multiple comparisons test	Mean Diff.	95.00% CI of diff.	Below threshold?	Summary	Adjusted P Value
	ve16-Ri-1R	ve16-#6	YFP	SAL	1.00404	6.20335	0.224509	-3.42288	-0.589413	5.93604			Assume sphericity?	Yes		Sympathetic tx x Sensory surgery	2.924	0.2134	ns	No
	ve16-Ri-3L	ve16-#8	YFP	SAL	1.09104	6.19357	0.902882	-3.36376	0.086139	6.46337			Alpha	0.05		Sympathetic tx	28.65	0.0163	*	Yes		YFP - Cre
	ve16-Ri-6R	ve16-#4	YFP	SAL	3.03083	7.81084	1.84902	-2.40984	0.0805579	9.28683						Sensory surgery	17.43	0.0088	**	Yes		SAL	3.228	0.6065 to 5.849	Yes	*	0.0178
	ve17-Ri-1	ve17-#8	YFP	SAL	2.05749	7.47214	1.07521	-3.1063	0.0604609	6.396						Individual	34.44	0.1319	ns	No		OHDA	1.352	-1.269 to 3.973	No	ns	0.3684
	ve17-Ri-8	ve17-#4	YFP	SAL	0.126333	3.18406	-0.720547	-2.51891	-0.706574	6.67211
	ve17-Ri-12	ve17-#2	YFP	SAL	5.80088	7.8885	1.6833	-2.3189	0.509232	7.41624			Elovl3
	ve16-Ri-1L	ve16-#6	Cre	SAL	-2.23465	2.31047	-2.12291	-5.43252	-2.46669	3.19321			Two-way RM ANOVA	Matching: Across row		Source of Variation	% of total variation	P value	P value summary	Significant?		Šídák's multiple comparisons test	Mean Diff.	95.00% CI of diff.	Below threshold?	Summary	Adjusted P Value
	ve16-Ri-3R	ve16-#8	Cre	SAL	-1.90309	2.22254	-0.623236	-3.8324	-0.419516	5.1013			Assume sphericity?	Yes		Sympathetic treatment x Sensory surgery	3.011	0.1711	ns	No
	ve16-Ri-6L	ve16-#4	Cre	SAL	1.84238	5.67738	0.0185492	-3.62282	-1.62366	7.03779			Alpha	0.05		Sympathetic treatment	33.66	0.0073	**	Yes		YFP - Cre
	ve17-Ri-2	ve17-#8	Cre	SAL	-3.38515	0.333178	-3.83054	-6.56376	-3.46452	1.5986						Sensory surgery	19.51	0.0038	**	Yes		SAL	3.579	1.036 to 6.122	Yes	**	0.0083
	ve17-Ri-7	ve17-#4	Cre	SAL	-1.6404	1.96229	-1.84885	-4.99196	-3.05997	3.34406						Individual	29.97	0.1198	ns	No		OHDA	1.56	-0.9832 to 4.103	No	ns	0.2574
	ve17-Ri-11	ve17-#2	Cre	SAL	1.06477	4.77164	0.0608403	-3.50459	-0.678627	5.47944
	ve16-Ri-2R	ve16-#7	YFP	OHDA	8.89515	11.2492	3.44026	-2.09237	1.46976	8.78429			Cidea
	ve16-Ri-4L	ve16-#3	YFP	OHDA	1.66239	8.26316	1.17744	-2.29404	0.150745	7.70807			Two-way RM ANOVA	Matching: Across row		Source of Variation	% of total variation	P value	P value summary	Significant?		Šídák's multiple comparisons test	Mean Diff.	95.00% CI of diff.	Below threshold?	Summary	Adjusted P Value
	ve16-Ri-5L	ve16-#5	YFP	OHDA	2.81801	9.1705	3.04056	-1.26299	1.40131	9.65692			Assume sphericity?	Yes		Sympathetic treatment x Sensory surgery	3.913	0.1702	ns	No
	ve17-Ri-3	ve17-#6	YFP	OHDA	2.59785	4.64027	-1.20813	-5.3195	-1.49933	3.23771			Alpha	0.05		Sympathetic treatment	17.01	0.0662	ns	No		YFP - Cre
	ve17-Ri-6	ve17-#3	YFP	OHDA	5.68562	11.2024	1.679	-2.30141	-0.760405	9.43698						Sensory surgery	21.15	0.0064	**	Yes		SAL	2.227	0.5441 to 3.909	Yes	*	0.0119
	ve17-Ri-10	ve17-#1	YFP	OHDA	3.43642	8.42236	1.24498	-3.13927	-0.0770417	6.92593						Individual	40.01	0.1104	ns	No		OHDA	0.8875	-0.7952 to 2.570	No	ns	0.3538
	ve16-Ri-2L	ve16-#7	Cre	OHDA	3.2985	6.70948	0.100888	-3.76916	-0.890142	5.98939
	ve16-Ri-4R	ve16-#3	Cre	OHDA	2.98693	10.185	3.00112	-1.28912	2.182	10.108			Fasn
	ve16-Ri-5R	ve16-#5	Cre	OHDA	4.09783	8.41631	1.50792	-2.82971	0.363755	6.68471			Two-way RM ANOVA	Matching: Across row		Source of Variation	% of total variation	P value	P value summary	Significant?		Šídák's multiple comparisons test	Mean Diff.	95.00% CI of diff.	Below threshold?	Summary	Adjusted P Value
	ve17-Ri-4	ve17-#6	Cre	OHDA	-0.144715	3.79946	-1.04698	-5.16553	-1.25089	3.45942			Assume sphericity?	Yes		Sympathetic treatment x Sensory surgery	4.47	0.1105	ns	No
	ve17-Ri-5	ve17-#3	Cre	OHDA	2.03236	6.25675	0.704257	-2.29823	-0.668347	7.20364			Alpha	0.05		Sympathetic treatment	6.57	0.2954	ns	No		YFP - Cre
	ve17-Ri-9	ve17-#1	Cre	OHDA	4.71153	8.22062	-0.217818	-4.98353	-2.02499	4.27519						Sensory surgery	20.49	0.0038	**	Yes		SAL	1.801	0.5848 to 3.018	Yes	**	0.006
																Individual	53.9	0.0254	*	Yes		OHDA	0.6543	-0.5621 to 1.871	No	ns	0.3409
	Delta Delta Cq												Acacb
	Sample	Ear Tag	Surgery	TX	UCP1	Elovl3	Cidea	Fasn	Acacb	ChREBPb			Two-way RM ANOVA	Matching: Across row		Source of Variation	% of total variation	P value	P value summary	Significant?		Šídák's multiple comparisons test	Mean Diff.	95.00% CI of diff.	Below threshold?	Summary	Adjusted P Value
	ve16-Ri-1R	ve16-#6	YFP	SAL	-1.18106	-0.255393	-0.611219	-0.566117	-0.496147	-1.09239			Assume sphericity?	Yes		Sympathetic treatment x Sensory surgery	6.544	0.1131	ns	No
	ve16-Ri-3L	ve16-#8	YFP	SAL	-1.09406	-0.265179	0.0671541	-0.506993	0.179405	-0.565059			Alpha	0.05		Sympathetic treatment	11.13	0.1308	ns	No		YFP - Cre
	ve16-Ri-6R	ve16-#4	YFP	SAL	0.845723	1.3521	1.01329	0.446923	0.173824	2.2584						Sensory surgery	19.52	0.0134	*	Yes		SAL	1.859	0.4010 to 3.317	Yes	*	0.0147
	ve17-Ri-1	ve17-#8	YFP	SAL	-0.127608	1.0134	0.239477	-0.249534	0.153727	-0.632435						Individual	41.1	0.1643	ns	No		OHDA	0.4956	-0.9623 to 1.954	No	ns	0.6315
	ve17-Ri-8	ve17-#4	YFP	SAL	-2.05877	-3.27468	-1.55627	0.337854	-0.613308	-0.356324
	ve17-Ri-12	ve17-#2	YFP	SAL	3.61577	1.42976	0.847573	0.537868	0.602498	0.387813			ChREBPb
	ve16-Ri-1L	ve16-#6	Cre	SAL	-4.41976	-4.14827	-2.95864	-2.57576	-2.37343	-3.83522			Two-way RM ANOVA	Matching: Across row		Source of Variation	% of total variation	P value	P value summary	Significant?		Šídák's multiple comparisons test	Mean Diff.	95.00% CI of diff.	Below threshold?	Summary	Adjusted P Value
	ve16-Ri-3R	ve16-#8	Cre	SAL	-4.08819	-4.23621	-1.45896	-0.975631	-0.32625	-1.92713			Assume sphericity?	Yes		Sympathetic treatment x Sensory surgery	2.434	0.1997	ns	No
	ve16-Ri-6L	ve16-#4	Cre	SAL	-0.342727	-0.781368	-0.817179	-0.766055	-1.5304	0.00935374			Alpha	0.05		Sympathetic treatment	8.364	0.2481	ns	No		YFP - Cre
	ve17-Ri-2	ve17-#8	Cre	SAL	-5.57025	-6.12557	-4.66627	-3.707	-3.37125	-5.42983						Sensory surgery	20.68	0.0025	**	Yes		SAL	2.736	0.8456 to 4.626	Yes	**	0.0069
	ve17-Ri-7	ve17-#4	Cre	SAL	-3.8255	-4.49645	-2.68457	-2.1352	-2.96671	-3.68437						Individual	55.61	0.0152	*	Yes		OHDA	1.338	-0.5522 to 3.229	No	ns	0.1767
	ve17-Ri-11	ve17-#2	Cre	SAL	-1.12033	-1.68711	-0.774888	-0.647818	-0.585361	-1.54899
	ve16-Ri-2R	ve16-#7	YFP	OHDA	6.71005	4.79043	2.60453	0.764397	1.56303	1.75586
	ve16-Ri-4L	ve16-#3	YFP	OHDA	-0.522716	1.80442	0.341716	0.562722	0.244011	0.679633
	ve16-Ri-5L	ve16-#5	YFP	OHDA	0.632911	2.71176	2.20483	1.59377	1.49458	2.62849
	ve17-Ri-3	ve17-#6	YFP	OHDA	0.412744	-1.81848	-2.04386	-2.46273	-1.40606	-3.79072
	ve17-Ri-6	ve17-#3	YFP	OHDA	3.50052	4.74364	0.843269	0.555353	-0.667139	2.40855
	ve17-Ri-10	ve17-#1	YFP	OHDA	1.25131	1.96362	0.40925	-0.282505	0.0162245	-0.102506
	ve16-Ri-2L	ve16-#7	Cre	OHDA	1.1134	0.250733	-0.734839	-0.912396	-0.796876	-1.03905
	ve16-Ri-4R	ve16-#3	Cre	OHDA	0.801823	3.72629	2.16539	1.56764	2.27527	3.07958
	ve16-Ri-5R	ve16-#5	Cre	OHDA	1.91273	1.95757	0.672193	0.0270529	0.457021	-0.343722
	ve17-Ri-4	ve17-#6	Cre	OHDA	-2.32982	-2.65929	-1.8827	-2.30877	-1.15762	-3.56901
	ve17-Ri-5	ve17-#3	Cre	OHDA	-0.152742	-0.201995	-0.131471	0.558538	-0.575081	0.175213
	ve17-Ri-9	ve17-#1	Cre	OHDA	2.52643	1.76188	-1.05355	-2.12676	-1.93172	-2.75324
